# Supplementary material for: Stabilization of DNA nanostructures by photo-cross-linking
Source: Royal Society of Chemistry journal article supplement (doi:10.1039/c1sm06303k), 2011-01-01
Supplement: c1sm06303k.pdf [file c1sm06303k.pdf]

## Supporting Information

### Stabilization of DNA nanostructures by photo-cross-linking

Miho Tagawa,<sup>\*a,b,†</sup> Koh-ichiroh Shohda,<sup>a</sup> Kenzo Fujimoto<sup>c</sup> and Akira Suyama<sup>a</sup>

<sup>a</sup> Department of Life Sciences and Institute of Physics, Graduate School of Arts and Sciences, The University of Tokyo, Komaba, 153-8902, Japan. Fax: +81 5454 6528; Tel: +81 5454 6528; E-mail: suyama@dna.c.u-tokyo.ac.jp

<sup>b</sup> Japan Science and Technology Agency (JST) PRESTO

<sup>c</sup> School of Material Science, Japan Advanced Institute of Science and Technology, Ishikawa, 923-1292, Japan.

<sup>†</sup> Present address: Center for Functional Nanomaterials, Brookhaven National Laboratory, Upton, NY, 11973, USA.

Tel: +1 631 344 4812; E-mail: mtagawa@bnl.gov

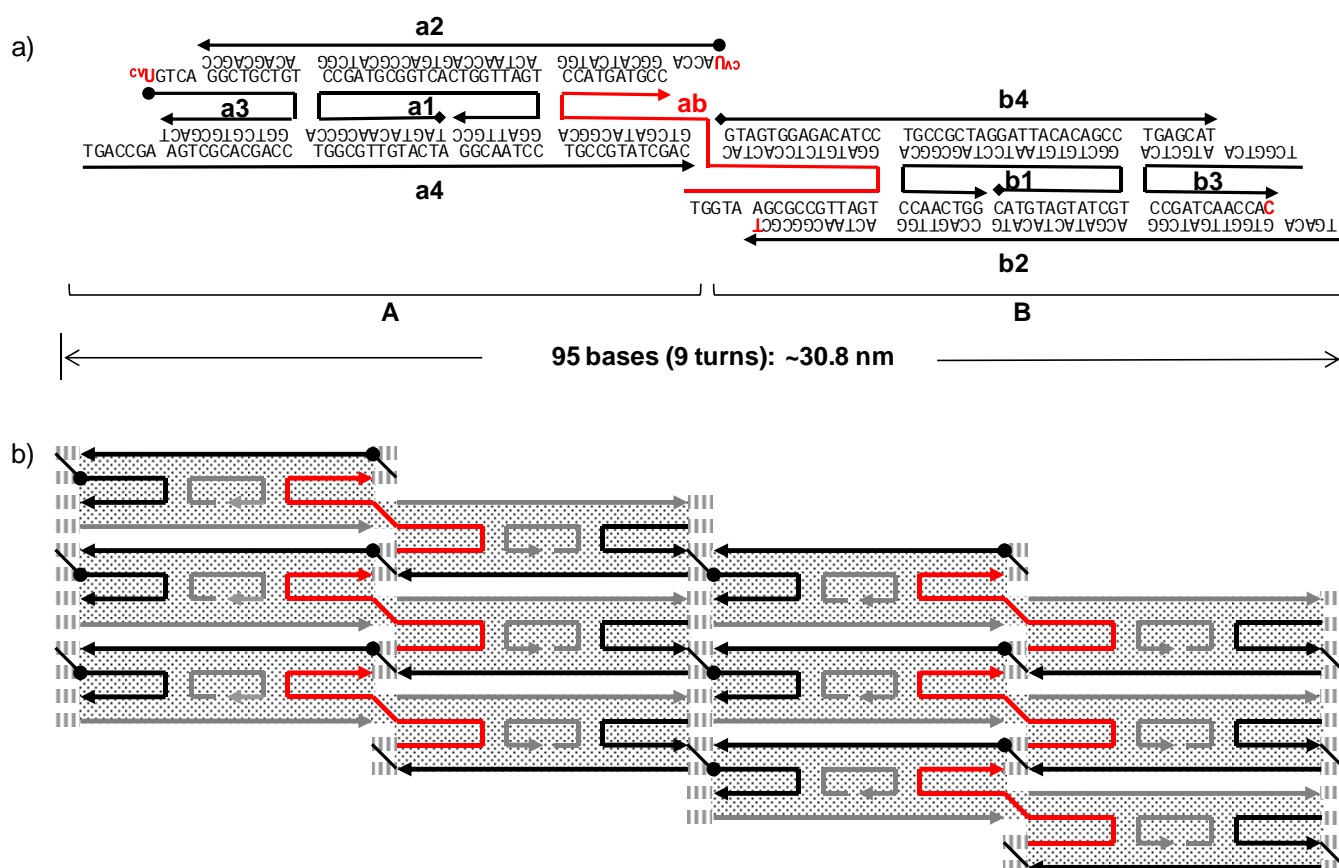

**Figure S1.** Design of a DXAB tile including <sup>CV</sup>Us and its arrangement into a 2D DNA array. (a) The sequences of the DXAB tile for constructing photoligated 2D DNA arrays. Arrowheads at the ends of strands indicate the 3'-terminals. The solid rhomboids at the 5'-ends represent phosphorylation. (b) The lattice topology of a 2D DNA array produced by the DXAB tiles. The solid circles represent <sup>CV</sup>U bases.
